# Supplementary material for: Electrochemical synthesis of carbon nano onions
Source: Royal Society of Chemistry journal article supplement (doi:10.1039/d0qi00950d), 2020-01-01
Supplement: d0qi00950d1.pdf [file d0qi00950d1.pdf]

## Supporting Information

### Electrochemical synthesis of carbon nano onions

Yixuan Bian, Lu Liu, Di Liu, Zhiwei Zhu, Yuanhua Shao and Meixian Li\*

College of Chemistry and Molecular Engineering, Beijing National Laboratory for  
Molecular Sciences, Peking University, Beijing 100871, China

Corresponding Author: Meixian Li ([lmwx@pku.edu.cn](mailto:lmwx@pku.edu.cn))

|                                                                                                    |    |
|----------------------------------------------------------------------------------------------------|----|
| Figure S1. Optical graph of an electrolytic cell with a three-electrode system.....                | P2 |
| Figure S2. TEM image of the electrolytic products.....                                             | P2 |
| Figure S3. TEM images and elemental composition by EDS characterization.....                       | P3 |
| Figure S4. Mass spectra of an electrolytic solution.....                                           | P4 |
| Figure S5. TEM images of the product after heating at 400 °C.....                                  | P5 |
| Figure S6. TEM images of product after heating at 450 °C.....                                      | P5 |
| Figure S7. TEM images of the product after heating at 500 °C.....                                  | P5 |
| Figure S8. TEM images of the collected products by ultrasonic dispersion and centrifugation.....   | P6 |
| Figure S9. STEM raw images of S-CNOs and H-CNOs as well as elemental distribution of C and O ..... | P6 |

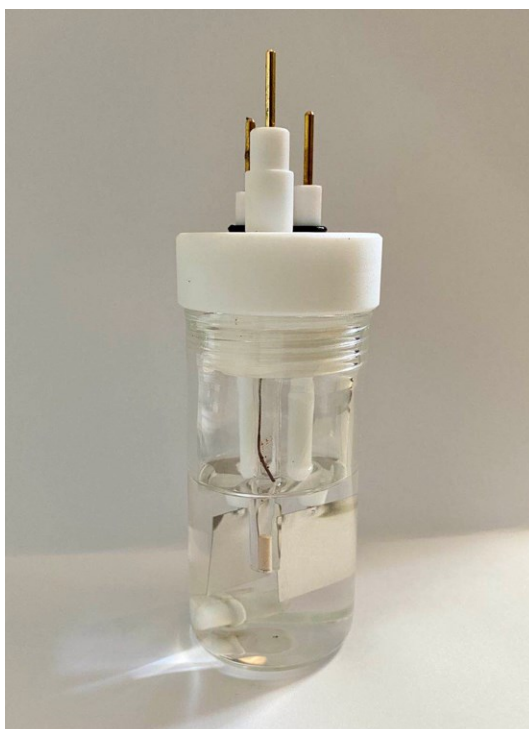

**Figure S1.** Optical graph of an electrolytic cell with a three-electrode system.

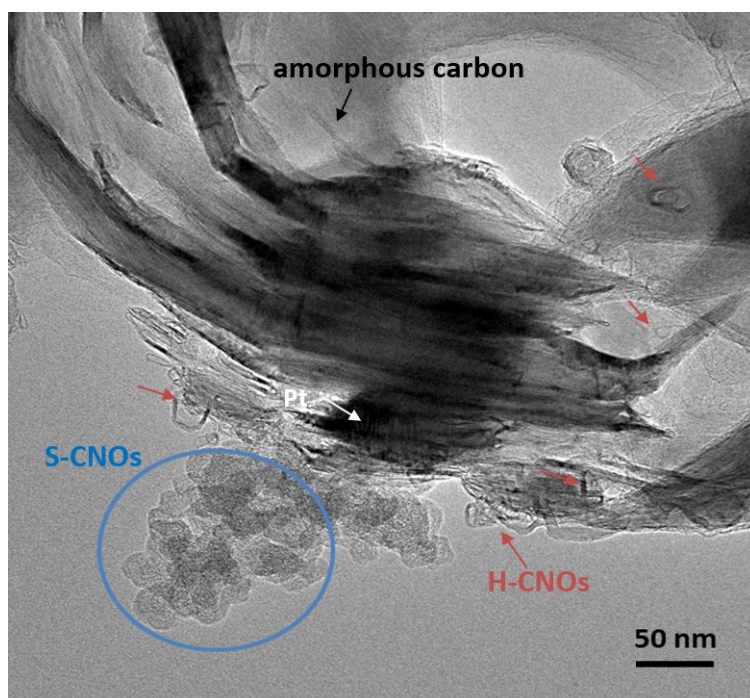

**Figure S2.** TEM image of the electrolytic products consisting of amorphous carbon, Pt NPs, S-CNOs and H-CNOs.

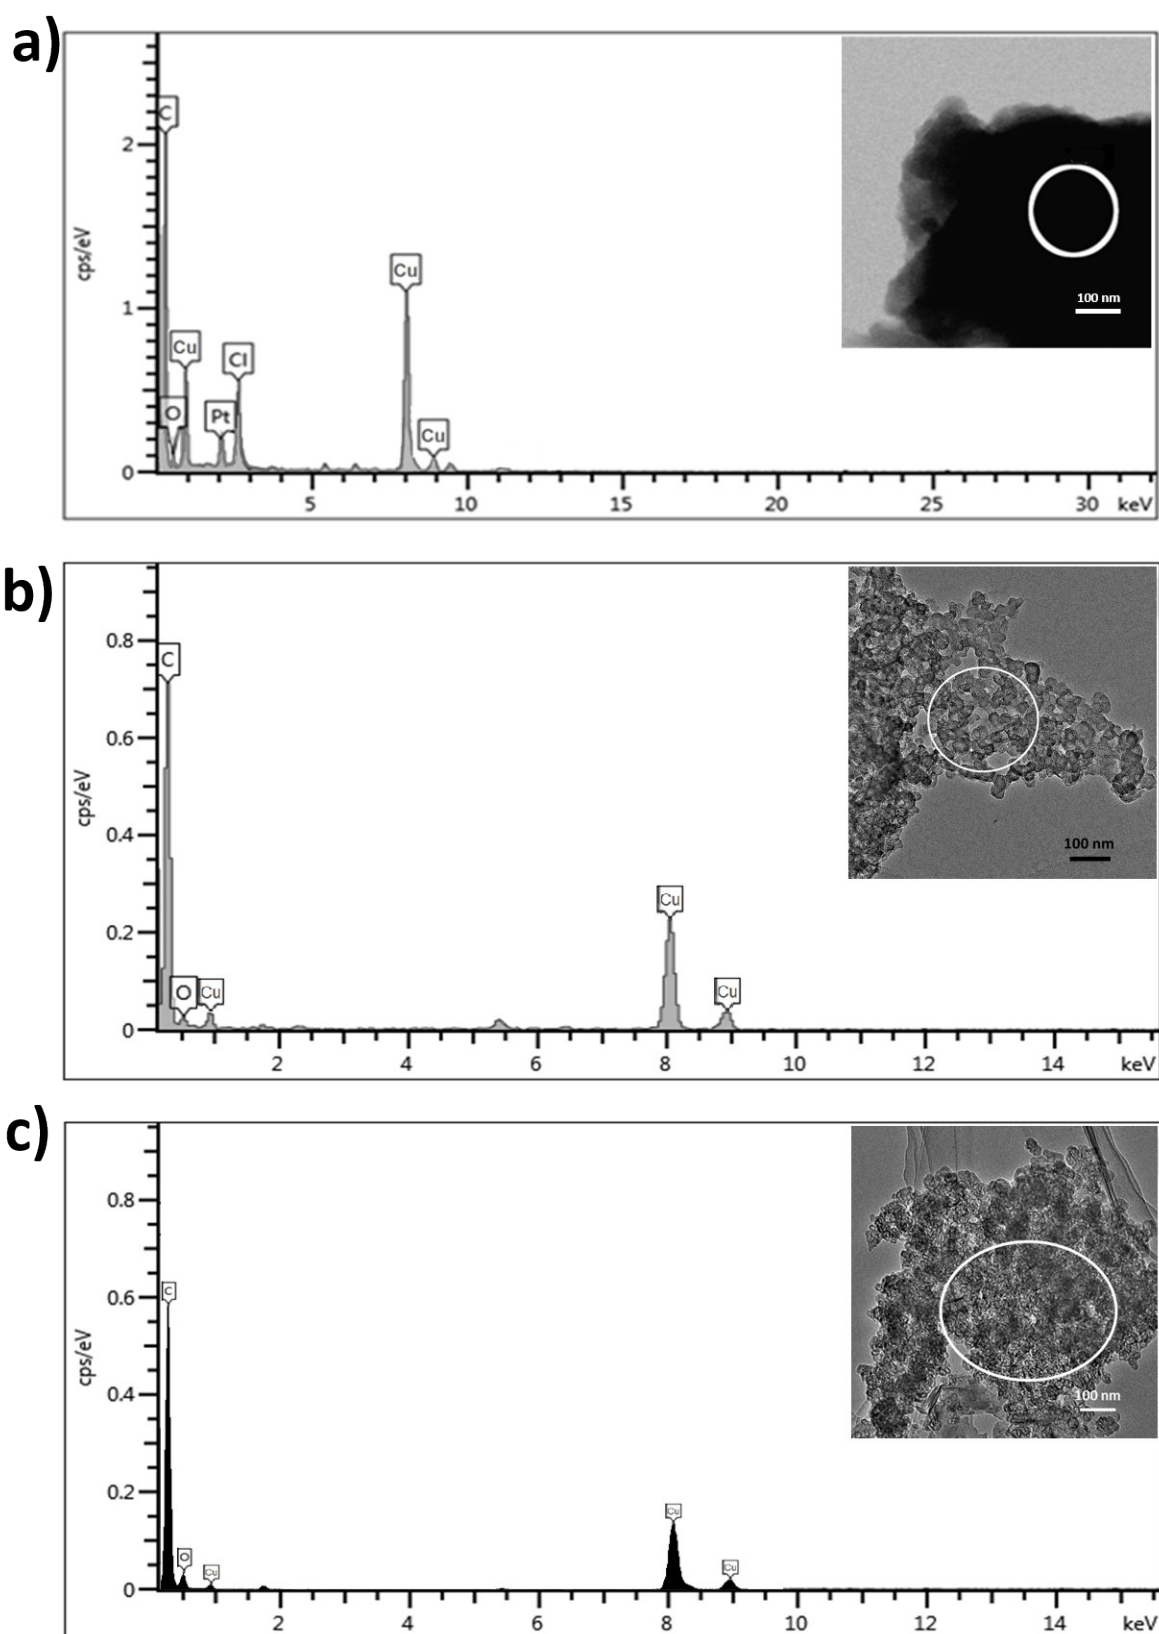

**Figure S3.** TEM images and elemental composition by EDS characterization of (a) amorphous carbon, (b) S-CNOs and (c) H-CNOs.

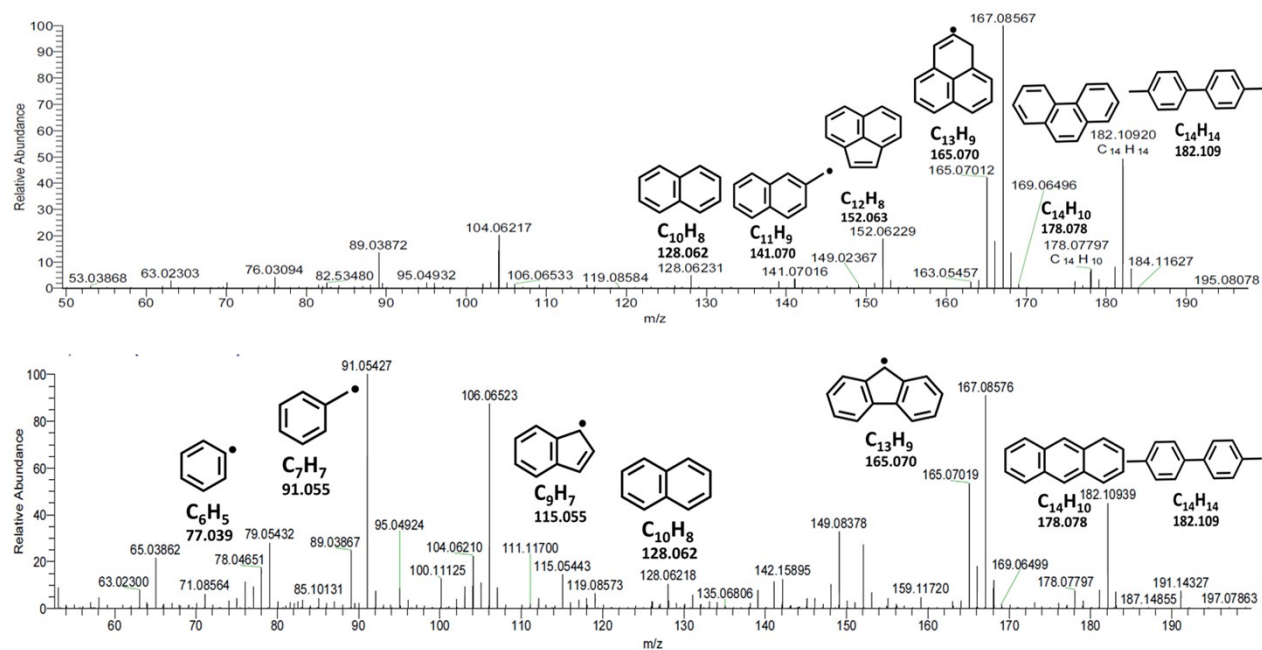

**Figure S4.** Mass spectra of an electrolytic solution after electrolysis of 5 hours and structures of some stable radicals and polycyclic aromatic hydrocarbons identified by GC-MS.

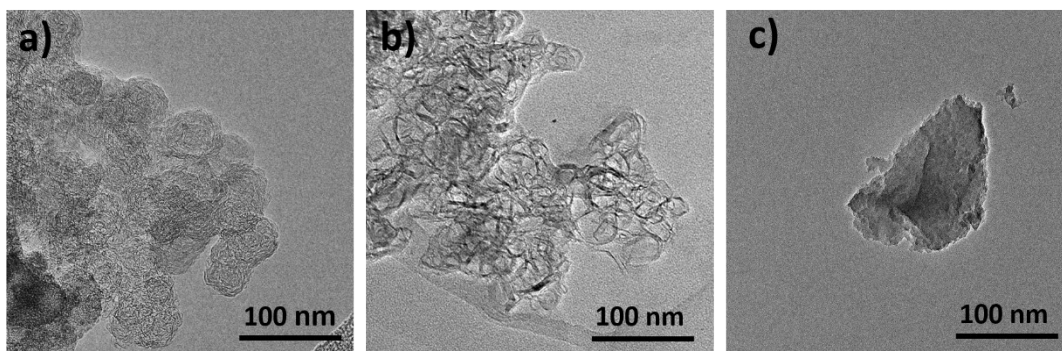

**Figure S5.** TEM images of the product after heating at 400 °C, (a)H-CNOs, (b)S-CNOs, (c) amorphous carbon.

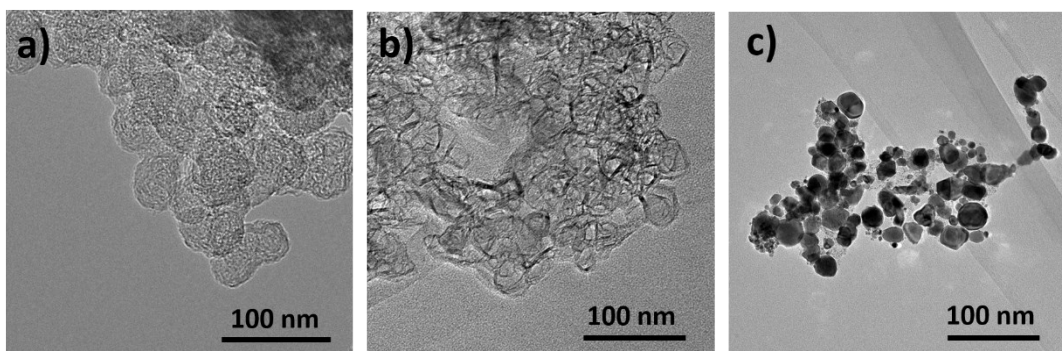

**Figure S6.** TEM images of product after heating at 450 °C, (a) H-CNOs, (b) S-CNOs, (c) Pt NPs.

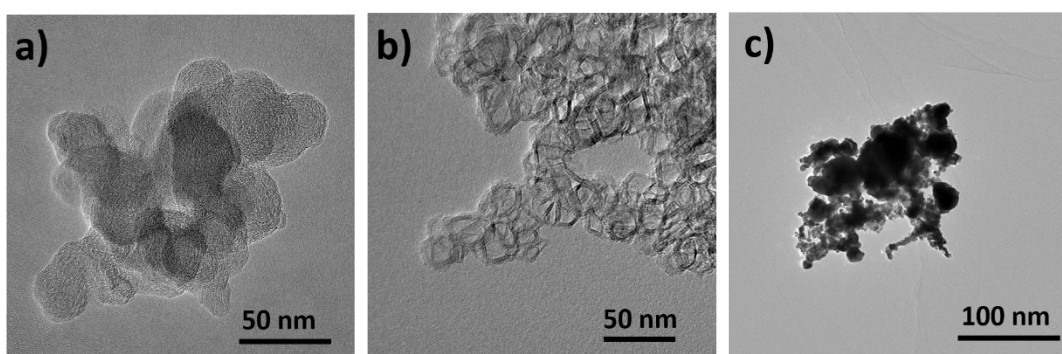

**Figure S7.** TEM images of the product after heating at 500 °C, (a) H-CNOs, (b)S-CNOs, (c) Pt NPs.

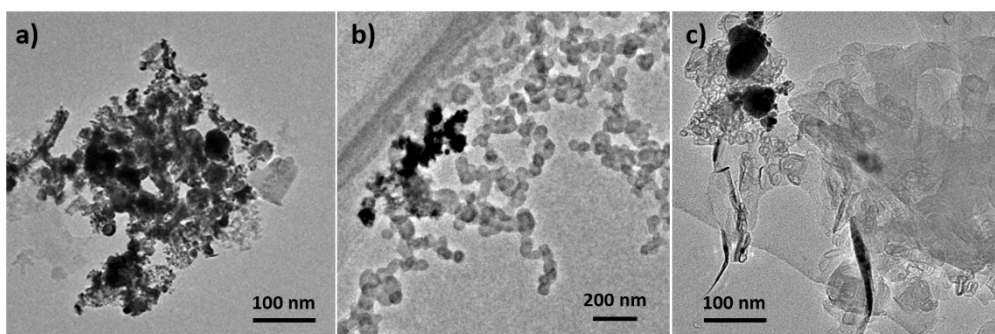

**Figure S8.** TEM images of the collected products by ultrasonically dispersed in CHP for 1 h at a concentration of 1 mg/mL and then centrifuged at (a) 6000 rpm, (b) 8000 rpm, and (c) 12000 rpm, respectively.

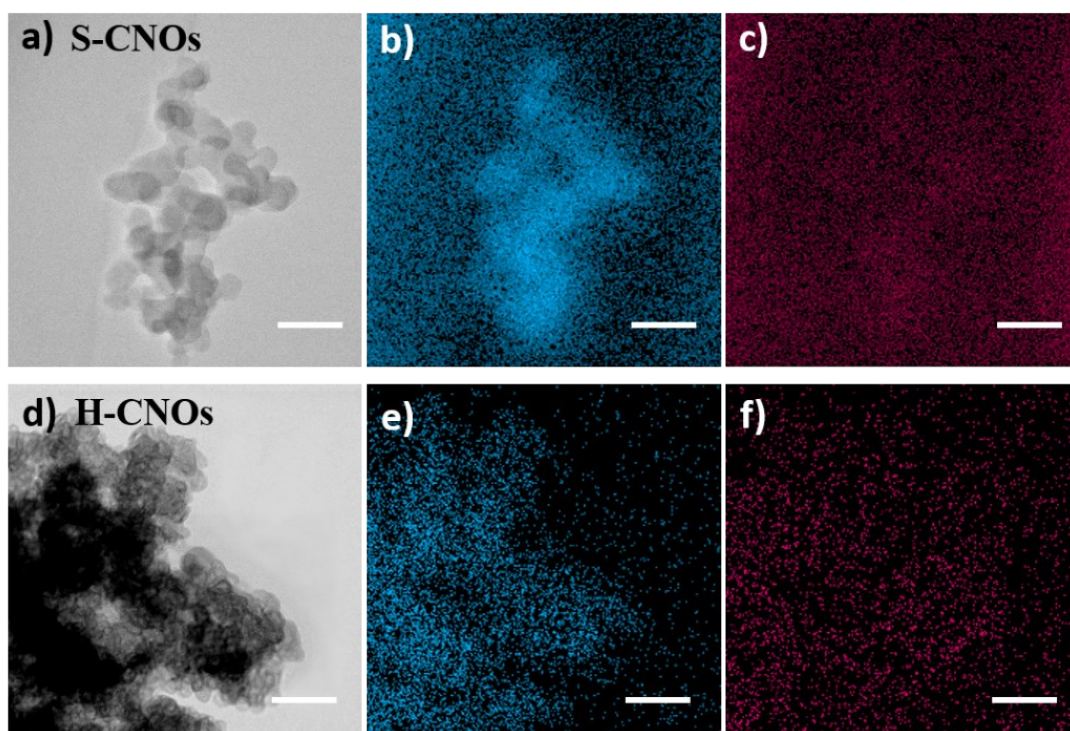

**Figure S9.** STEM raw images of (a) S-CNOs and (d) H-CNOs and elemental distribution of C (b, e), O (c, f). The scale bars are 100 nm.
